# Supplementary material for: Network-based approach to identify biomarkers predicting response and prognosis for HER2-negative breast cancer treatment with taxane-anthracycline neoadjuvant chemotherapy
Source: PeerJ journal article supplement (doi:10.7717/peerj.7515), 2019-09-03

### Scale independence

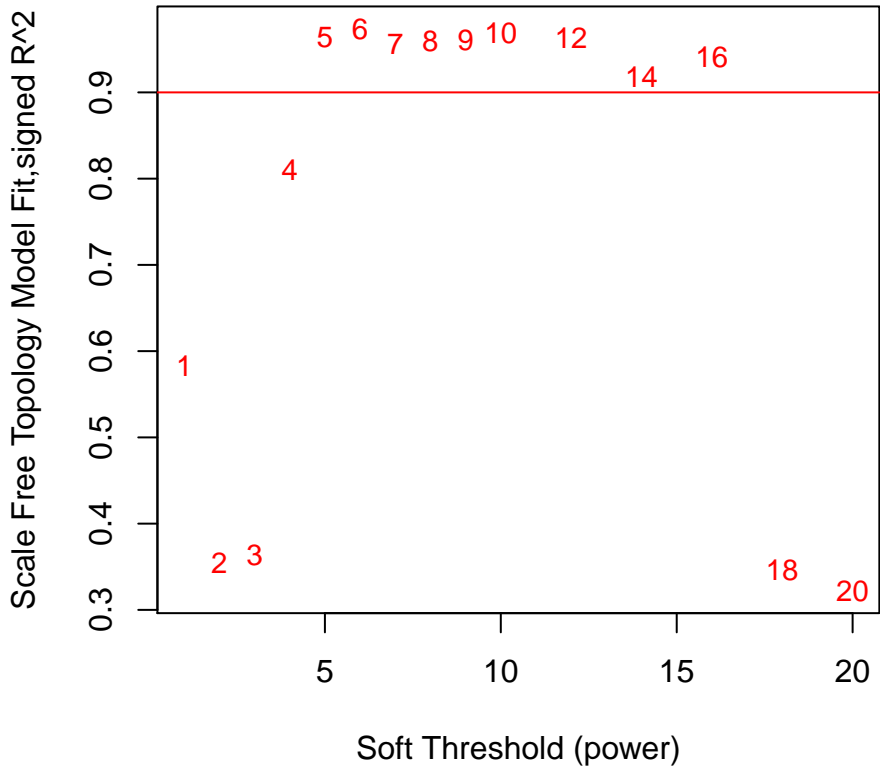

### Mean connectivity

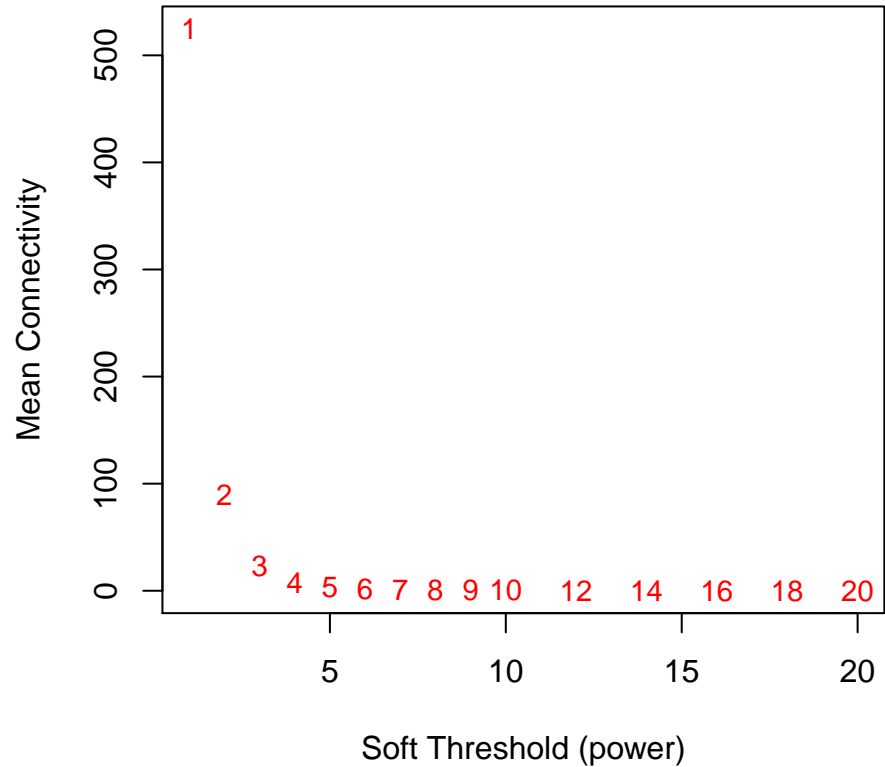

Supplement: Supplementary_Figure_1.pdf [file Supplementary_Figure_1.pdf]
